# Supplementary material
Source: Springer Nature journal article supplement (https://www.springermedizin.de/resource/supplementary/12889_2007_1024_MOESM1_ESM.pdf/9503158)

LIVERPOOL

OTHER FIVE CENTRES

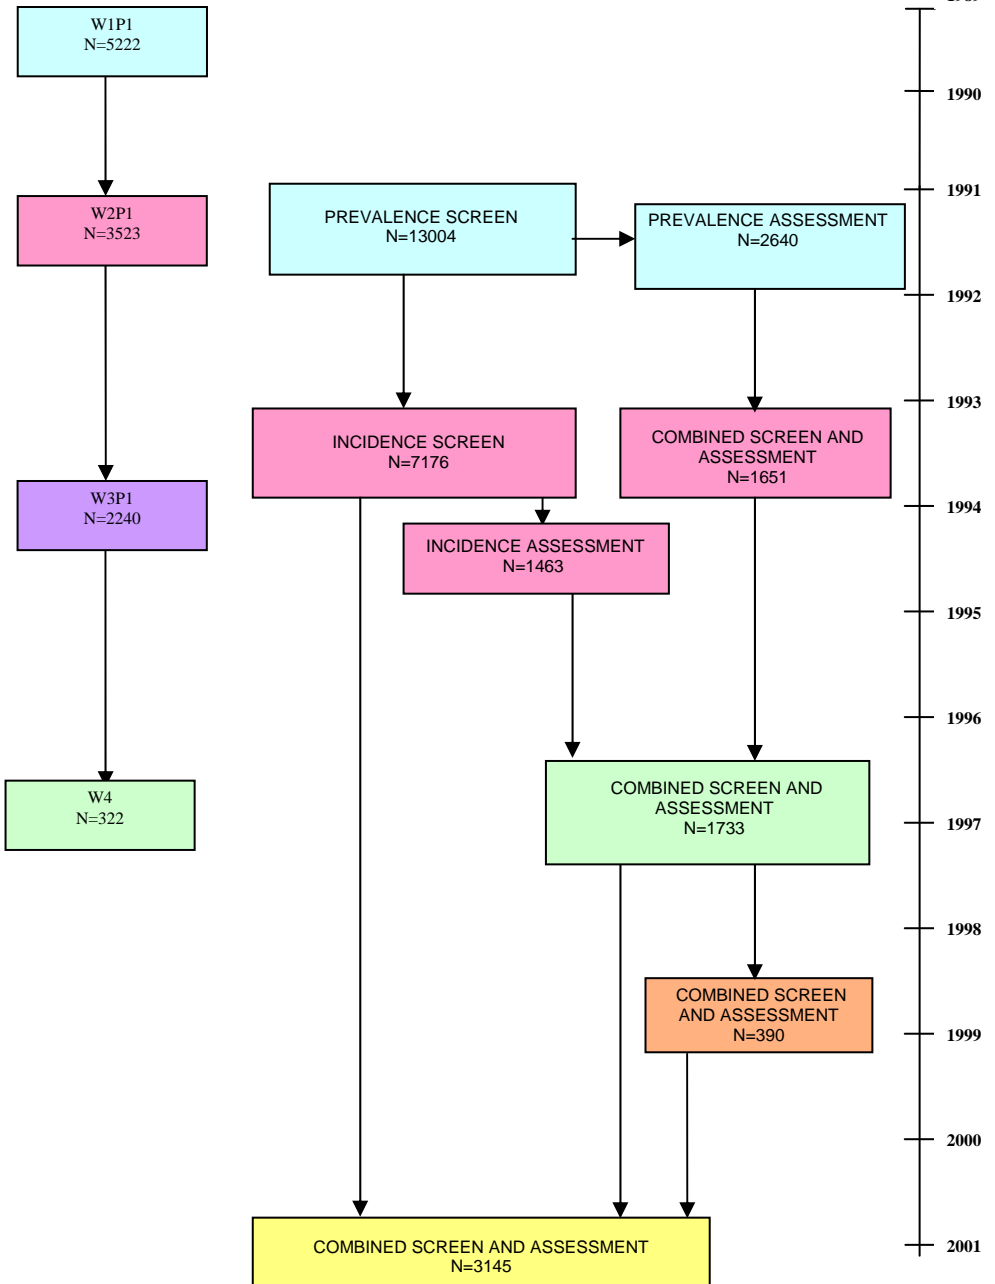

Supplement: MOESM1 [file 9503158]
